# Supplementary material for: An NMR study on the gelation of N,N′-bis(4-N-alkylo-xybenzoyl) hydrazine (4Dn) in two aromatic solvents
Source: Royal Society of Chemistry journal article supplement (doi:10.1039/c4nj02204a), 2015-01-01
Supplement: c4nj02204a1.pdf [file c4nj02204a1.pdf]

NMR Study on the aggregation of N, N'-Bis (4-N-Alkylo-Xybenzoyl)  
Hydrazine (4Dn) in two aromatic solvents

Jianxi Song,<sup>a,b</sup> Haitao Wang<sup>\*a</sup> and Min Li<sup>\*a</sup>

<sup>a</sup>Key Laboratory of Automobile Materials, Ministry of Education, Institute of Materials Science and Engineering, Jilin University, Changchun 130012, China

<sup>b</sup>Center of Analytical and Testing, Beihua University, Jilin 132013, China.

Supporting information

Table s1 Solvent Effects on Gelation

| Solvents           | CGC of<br>4D16 (mM) | $\alpha$ | $\beta$ | $\pi^*$ |
|--------------------|---------------------|----------|---------|---------|
| Hexane             | G (5.7)             | 0        | 0       | -0.04   |
| n-pentane          | G (7.9)             | 0        | 0       | -0.08   |
| Methycyclohexane   | G (8.1)             |          |         |         |
| Cyclohexane        | G (10.7)            | 0        | 0       | 0       |
| Toluene            | G (14)              | 0        | 0.11    | 0.54    |
| Benzene            | G (21.4)            | 0        | 0.10    | 0.59    |
| Ethyl ether        | G (25)              | 0        | 0.47    | 0.27    |
| 1,2-Dichloroethane | G (25)              | 0        | 0.10    | 0.81    |
| Ethyl acetate      | G (27.5)            | 0        | 0.45    | 0.55    |
| THF                | G (45)              | 0        | 0.55    | 0.58    |
| DMF                | G (25)              | 0        | 0.69    | 0.88    |
| DMSO               | G (30)              | 0        | 0.76    | 1.00    |
| n-butanol          | P                   | 0.84     | 0.84    | 0.47    |
| Acetone            | P                   | 0.08     | 0.43    | 0.71    |
| Ethanol            | P                   | 0.86     | 0.76    | 0.54    |

$\alpha$ ,  $\beta$  and  $\pi^*$  are hydrogen bond donating ability, hydrogen bond accepting ability and polarizability, respectively, according to Kamlet-Taft parameter.

G: stable gel formed in ambient temperature; P: precipitate

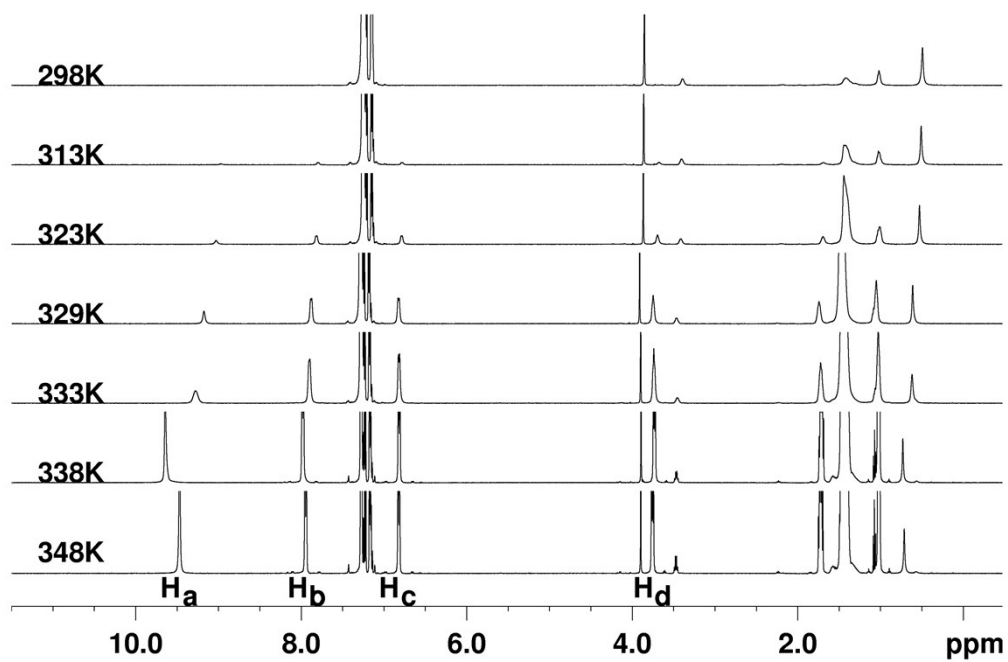

Figure S1. Superimposition of 4D16 (24 mM)  $^1\text{H}$  NMR spectra recorded in benzene- $d_6$  at different temperatures.

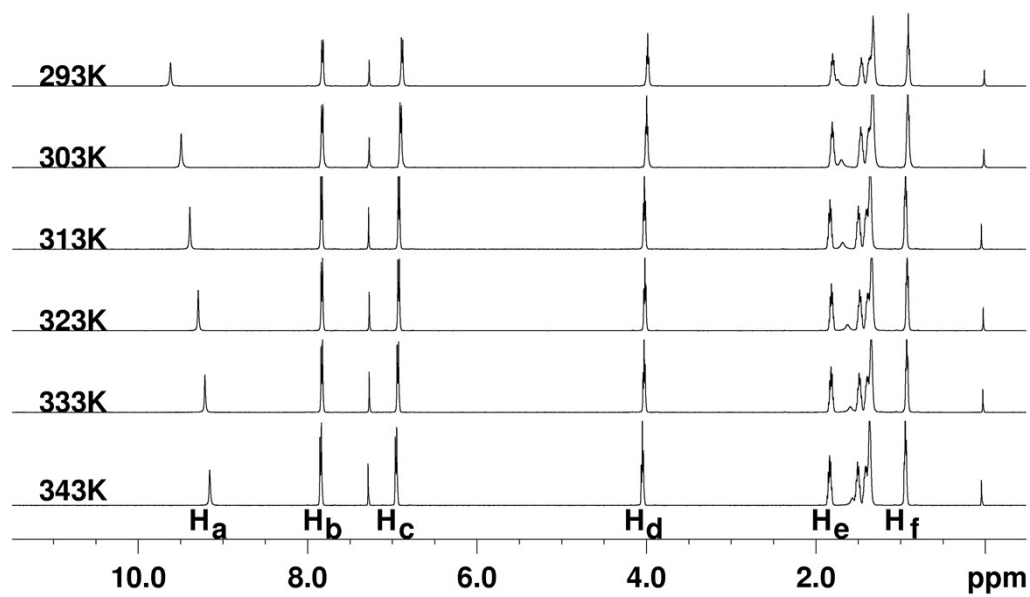

Figure S2. Superimposition of 4D7 (50 mM)  $^1\text{H}$  NMR spectra recorded in chloroform- $d_1$  at different temperatures.

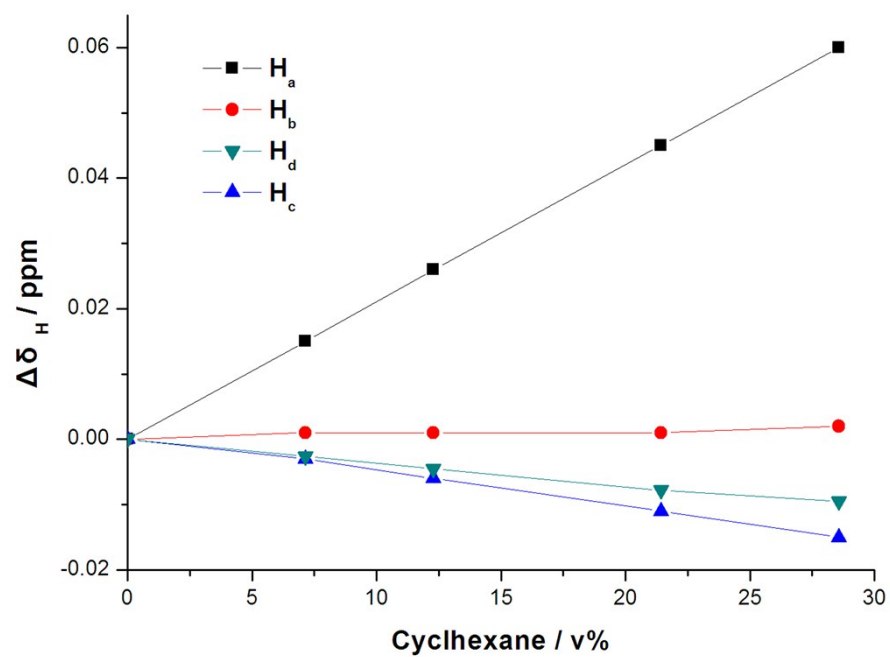

Figure S3. Peak shifts with various volume percentages of cyclohexane in cyclohexane/ $\text{chloroform-}d_1$  mixture solvents for 4D7 (8.1mM).
